# Supplementary material
Source: HighWire-hosted journal article supplement (https://jitc.bmj.com/content/10/11/e005548)
Supplement: inline-supplementary-material-2 [file inline-supplementary-material-2.xlsx]

## Sheet: Sheet1
Sample number	Internal Alias	Estimated_Number_of_Cells	Mean_Reads_per_Cell	Median_Genes_per_Cell	Number_of_Reads	Valid_Barcodes	Sequencing_Saturation	Q30_Bases_in_Barcode	Q30_Bases_in_RNA_Read	Q30_Bases_in_UMI	Reads_Mapped_to_Genome	Reads_Mapped_Confidently_to_Genome	Reads_Mapped_Confidently_to_Intergenic_Regions	Reads_Mapped_Confidently_to_Intronic_Regions	Reads_Mapped_Confidently_to_Exonic_Regions	Reads_Mapped_Confidently_to_Transcriptome	Reads_Mapped_Antisense_to_Gene	Fraction_Reads_in_Cells	Total_Genes_Detected	Median_UMI_Counts_per_Cell	Antibody__Number_of_Reads	Antibody__Mean_Reads_per_Cell	Antibody__Valid_Barcodes	Antibody__Sequencing_Saturation	Antibody__Q30_Bases_in_Barcode	Antibody__Q30_Bases_in_Antibody_Read	Antibody__Q30_Bases_in_UMI	Antibody__Fraction_Antibody_Reads	Antibody__Fraction_Antibody_Reads_Usable	Antibody__Antibody_Reads_Usable_per_Cell	Antibody__Fraction_Antibody_Reads_in_Aggregate_Barcodes	Antibody__Fraction_Unrecognized_Antibody	Antibody__Antibody_Reads_in_Cells	Antibody__Median_UMIs_per_Cell__summed_over_all_recognized_antibody_barcodes_
S1	BS1014_PEMBRO_1	17,117	25,430	695	435,291,533	0.978	0.736	0.952	0.933	0.946	0.978	0.934	0.037	0.196	0.701	0.658	0.028	0.613	23,131	1,593	59,303,002	3,464	0.995	0.863	0.962	0.964	0.963	0.96	0.687	2,379	0	0.04	0.719	246
S2	BS1014_TIM3_1	14,118	36,863	761	520,436,094	0.977	0.823	0.952	0.932	0.947	0.977	0.93	0.038	0.207	0.685	0.641	0.03	0.631	22,735	1,679	81,364,810	5,763	0.995	0.937	0.963	0.966	0.963	0.961	0.678	3,909	0	0.039	0.709	170
S3	BS1014_LAG3_1	20,567	26,338	435	541,711,684	0.976	0.797	0.953	0.934	0.947	0.977	0.925	0.037	0.196	0.692	0.647	0.031	0.614	23,389	921	79,371,143	3,859	0.995	0.914	0.963	0.966	0.963	0.958	0.655	2,526	0	0.042	0.687	84
S4	BS1014_DP47_1	8,162	62,852	1,515	513,004,143	0.978	0.84	0.953	0.937	0.947	0.978	0.927	0.038	0.216	0.674	0.636	0.024	0.757	22,944	3,918	65,019,548	7,966	0.995	0.936	0.96	0.962	0.961	0.956	0.707	5,629	0	0.044	0.743	283
S5	BS1014_PEMBRO_2	12,273	43,354	1,050	532,095,241	0.975	0.824	0.953	0.932	0.948	0.975	0.931	0.049	0.309	0.572	0.529	0.029	0.848	24,036	2,413	56,001,255	4,562	0.995	0.93	0.962	0.963	0.963	0.952	0.762	3,475	0	0.048	0.804	193
S6	BS1014_TIM3_2	11,271	45,330	1,304	510,915,760	0.975	0.809	0.952	0.932	0.947	0.975	0.934	0.048	0.301	0.585	0.543	0.027	0.908	24,240	3,136	51,147,566	4,537	0.994	0.892	0.961	0.963	0.961	0.95	0.769	3,490	0	0.05	0.814	309
S7	BS1014_LAG3_2	12,402	47,303	1,359	586,662,474	0.975	0.795	0.953	0.933	0.948	0.973	0.928	0.048	0.316	0.564	0.522	0.028	0.904	24,953	3,306	50,209,497	4,048	0.994	0.843	0.961	0.963	0.961	0.949	0.753	3,050	0	0.051	0.798	389
S8	BS1014_DP47_2	22,384	22,558	1,346	504,960,331	0.976	0.613	0.952	0.935	0.948	0.973	0.926	0.044	0.273	0.61	0.573	0.024	0.914	25,354	3,332	75,260,866	3,362	0.995	0.76	0.963	0.964	0.964	0.96	0.804	2,702	0.006	0.04	0.842	528
S9	BS1030_PEMBRO_1	13,206	42,005	1,946	554,723,555	0.973	0.66	0.952	0.921	0.948	0.967	0.926	0.047	0.272	0.607	0.555	0.032	0.926	25,316	5,919	31,729,133	2,402	0.994	0.519	0.962	0.963	0.963	0.952	0.601	1,443	0.014	0.048	0.635	580
S10	BS1030_TIM3_1	15,163	42,419	1,880	643,212,440	0.974	0.677	0.953	0.938	0.948	0.974	0.927	0.046	0.251	0.631	0.588	0.027	0.912	25,117	5,756	48,427,960	3,193	0.995	0.551	0.964	0.964	0.964	0.958	0.549	1,754	0.003	0.042	0.576	640
S11	BS1030_LAG3_1	9,616	52,987	1,949	509,527,025	0.974	0.732	0.956	0.937	0.95	0.972	0.931	0.046	0.244	0.641	0.597	0.028	0.937	24,242	6,239	56,989,867	5,926	0.994	0.677	0.961	0.964	0.961	0.952	0.516	3,056	0.011	0.048	0.545	807
S12	BS1030_DP47_1	10,054	67,947	1,861	683,146,455	0.975	0.813	0.953	0.931	0.948	0.976	0.937	0.046	0.245	0.645	0.602	0.027	0.951	24,587	5,897	42,531,023	4,230	0.994	0.652	0.961	0.959	0.962	0.95	0.578	2,443	0.019	0.05	0.612	712
S13	BS1030_PEMBRO_2	19,821	30,147	1,520	597,556,001	0.973	0.662	0.95	0.938	0.945	0.968	0.911	0.045	0.22	0.646	0.598	0.031	0.863	24,812	4,378	40,993,192	2,068	0.994	0.498	0.961	0.959	0.962	0.956	0.659	1,362	0.007	0.044	0.693	516
S14	BS1030_TIM3_2	18,407	23,056	1,619	424,401,369	0.972	0.533	0.951	0.937	0.947	0.971	0.896	0.043	0.213	0.64	0.597	0.028	0.901	24,527	4,597	41,851,224	2,273	0.994	0.53	0.962	0.963	0.963	0.955	0.727	1,653	0.011	0.045	0.766	662
S15	BS1030_LAG3_2	12,975	44,858	1,799	582,038,751	0.974	0.712	0.952	0.935	0.948	0.973	0.928	0.047	0.237	0.645	0.601	0.029	0.909	24,586	5,603	46,126,905	3,555	0.994	0.614	0.962	0.966	0.963	0.951	0.688	2,446	0.014	0.049	0.727	783
S16	BS1030_DP47_2	12,281	42,449	1,800	521,326,179	0.974	0.714	0.951	0.937	0.946	0.974	0.927	0.045	0.21	0.673	0.629	0.028	0.904	24,213	5,627	54,989,590	4,477	0.994	0.619	0.961	0.962	0.961	0.952	0.606	2,713	0.033	0.048	0.641	876
S17	BS1036_PEMBRO_1	8,847	57,341	2,167	507,296,679	0.977	0.75	0.952	0.934	0.948	0.961	0.903	0.04	0.272	0.591	0.556	0.019	0.839	24,038	5,016	48,472,109	5,478	0.995	0.58	0.961	0.963	0.961	0.957	0.635	3,478	0.018	0.043	0.667	1,283
S18	BS1036_TIM3_1	1,364	245,554	1,840	334,936,320	0.977	0.935	0.956	0.94	0.95	0.963	0.885	0.035	0.206	0.644	0.609	0.02	0.526	19,711	3,986	52,154,816	38,236	0.993	0.861	0.961	0.962	0.961	0.93	0.285	10,888	0.011	0.07	0.308	1,384
S19	BS1036_LAG3_1	5,191	58,243	1,951	302,341,400	0.977	0.761	0.956	0.937	0.951	0.973	0.913	0.04	0.256	0.617	0.582	0.019	0.751	22,582	4,375	63,336,720	12,201	0.995	0.702	0.962	0.962	0.962	0.954	0.573	6,991	0	0.046	0.604	1,805
S20	BS1036_DP47_1	3,220	99,882	1,367	321,622,998	0.978	0.92	0.957	0.941	0.951	0.971	0.914	0.037	0.237	0.639	0.605	0.018	0.752	20,624	2,640	47,114,826	14,631	0.995	0.85	0.961	0.963	0.961	0.946	0.486	7,105	0.006	0.054	0.516	909
S21	BS558_PEMBRO_1	3,454	105,412	2,237	364,095,077	0.977	0.847	0.957	0.935	0.951	0.967	0.911	0.04	0.242	0.629	0.59	0.023	0.777	22,781	5,559	48,012,794	13,900	0.994	0.82	0.961	0.963	0.962	0.941	0.435	6,046	0.008	0.059	0.465	957
S23	BS558_LAG3_1	1,897	141,832	1,775	269,056,937	0.974	0.907	0.955	0.933	0.95	0.966	0.887	0.046	0.264	0.577	0.537	0.024	0.745	21,387	3,867	35,448,494	18,686	0.992	0.886	0.962	0.962	0.962	0.881	0.288	5,376	0	0.119	0.328	549
S24	BS558_DP47_1	893	365,782	1,295	326,644,108	0.975	0.972	0.956	0.935	0.95	0.968	0.883	0.039	0.188	0.656	0.614	0.025	0.48	18,099	2,662	40,546,889	45,405	0.993	0.921	0.963	0.958	0.964	0.912	0.141	6,399	0.002	0.088	0.155	475
S25	BS1036_PEMBRO_2	15,426	66,944	1,681	1,032,682,280	0.973	0.842	0.952	0.941	0.947	0.969	0.923	0.045	0.261	0.616	0.571	0.03	0.84	24,930	4,003	64,069,433	4,153	0.995	0.562	0.963	0.966	0.963	0.962	0.705	2,927	0.01	0.038	0.737	1,104
S26	BS1036_TIM3_2	8,348	48,712	1,371	406,651,902	0.975	0.825	0.951	0.938	0.946	0.969	0.928	0.048	0.261	0.618	0.578	0.025	0.835	22,670	3,153	65,631,501	7,861	0.995	0.705	0.962	0.962	0.963	0.959	0.69	5,423	0.012	0.041	0.723	1,363
S27	BS1036_LAG3_2	16,854	33,704	1,456	568,058,308	0.973	0.748	0.954	0.939	0.95	0.975	0.933	0.045	0.255	0.634	0.589	0.029	0.839	24,129	3,300	79,277,122	4,703	0.995	0.622	0.963	0.964	0.964	0.963	0.698	3,284	0.018	0.037	0.729	1,066
S28	BS1036_DP47_2	10,373	41,620	1,450	431,732,654	0.975	0.791	0.952	0.935	0.946	0.967	0.922	0.045	0.242	0.635	0.591	0.028	0.844	23,179	3,386	80,925,280	7,801	0.995	0.714	0.964	0.968	0.965	0.96	0.671	5,232	0.008	0.04	0.702	1,320
S29	BS558_PEMBRO_2	14,315	33,115	1,463	474,049,632	0.97	0.679	0.953	0.93	0.948	0.971	0.916	0.05	0.296	0.571	0.513	0.042	0.832	25,404	3,373	56,445,500	3,943	0.994	0.608	0.962	0.965	0.962	0.959	0.577	2,275	0.026	0.041	0.605	740
S30	BS558_TIM3_2	5,567	68,456	1,461	381,094,688	0.974	0.851	0.959	0.936	0.954	0.975	0.928	0.05	0.261	0.617	0.568	0.033	0.807	22,748	3,598	44,762,352	8,040	0.995	0.743	0.963	0.966	0.964	0.954	0.521	4,187	0.02	0.046	0.549	917
S31	BS558_LAG3_2	9,121	64,532	1,639	588,598,904	0.973	0.822	0.952	0.932	0.947	0.974	0.927	0.049	0.265	0.613	0.564	0.033	0.835	24,288	4,115	51,420,044	5,637	0.994	0.699	0.962	0.964	0.962	0.958	0.603	3,399	0.006	0.042	0.633	869
S32	BS558_DP47_2	12,507	39,059	1,615	488,522,428	0.972	0.726	0.951	0.936	0.946	0.971	0.918	0.05	0.28	0.588	0.54	0.032	0.875	24,963	3,923	56,864,425	4,546	0.995	0.679	0.961	0.963	0.962	0.958	0.533	2,423	0.016	0.042	0.559	635
